# Supplementary material for: Fluorine-free blue phosphorescent emitters for efficient phosphorescent organic light emitting diodes
Source: Royal Society of Chemistry journal article supplement (doi:10.1039/c4tc00715h), 2014-01-01
Supplement: c4tc00715h1.pdf [file c4tc00715h1.pdf]

## Supporting Information

for

### Fluorine-free Blue Phosphorescent Emitters for Efficient Phosphorescent Organic Light Emitting Diodes

Jieun Lee,<sup>a</sup> Hankook Oh,<sup>a</sup> Jinho Kim,<sup>a</sup> Ki-Min Park,<sup>b</sup> Kyoung Soo Yook,<sup>c</sup> Jun Yeob Lee<sup>c</sup> and  
Youngjin Kang<sup>a,\*</sup>

*<sup>a</sup>Division of Science education & Department of Chemistry, Kangwon National University, C  
huncheon 200-701, Republic of Korea*

*<sup>b</sup>Department of Chemistry and Research Institute of Natural Science, Gyeongsang National  
University, Jinju 660-701, Korea*

*<sup>c</sup>Department of Polymer Science & Engineering, Dankook University, Yongin, Gyeonggi-do  
448-701, Republic of Korea,*

Corresponding Authors: Youngjin kang(kangy@kangwon.ac.kr)

## Contents

- **Figure S1.**  $^1\text{H}$  NMR of *2,5-dimethoxy-pyridine-3-boronic acid*. in  $\text{CDCl}_3$ .
- **Figure S2.**  $^1\text{H}$  NMR of *2',6'-dimethoxy-4-methyl-2,3'-bipyridine* in  $\text{CDCl}_3$ .
- **Figure S3.**  $^1\text{H}$  NMR of **1** in  $\text{CDCl}_3$ .
- **Figure S4.**  $^{13}\text{C}$  NMR of **1** in  $\text{CDCl}_3$ .
- **Figure S5.**  $^1\text{H}$  NMR of **2** in  $\text{CDCl}_3$ .
- **Figure S6.**  $^{13}\text{C}$  NMR of **2** in  $\text{CDCl}_3$ .
- **Figure S7.** TGA curves of **1** and **2**.
- **Figure S8.** Oxidation potentials of **1**, **2** and **Firpic**.
- **Table S1.** Crystal Data and Structure Refinement for **1** and **2**.
- **Table S2.** Selected bond lengths ( $\text{\AA}$ ) and bond angles ( $^\circ$ ) for **1**.
- **Table S3.** Selected bond lengths ( $\text{\AA}$ ) and bond angles ( $^\circ$ ) for **2**.
- **Table S4.** Intermolecular C-H $\cdots$ O Hydrogen Bonds for **1** and **2** [ $\text{\AA}$  and  $^\circ$ ].
- **Table S5.** Intermolecular C-H $\cdots\pi$  for **1** [ $\text{\AA}$  and  $^\circ$ ]. *Cg1*, and *Cg2* are the centroids of the N1/C6-C10, and N2/C1-C5 pyridine rings, respectively.
- **Table S6.** Intermolecular C-H $\cdots\pi$  for **2** [ $\text{\AA}$  and  $^\circ$ ]. *Cg1*, *Cg2*, *Cg3*, *Cg4*, *Cg5*, *Cg6*, and *Cg7* are the centroids of the N2/C6-C10, N3/C14-C16, N5/C27-C31, N6/C33-C37, N7/C38-C42, N9/C51-C55, and N10/C59-C63 pyridine rings, respectively.



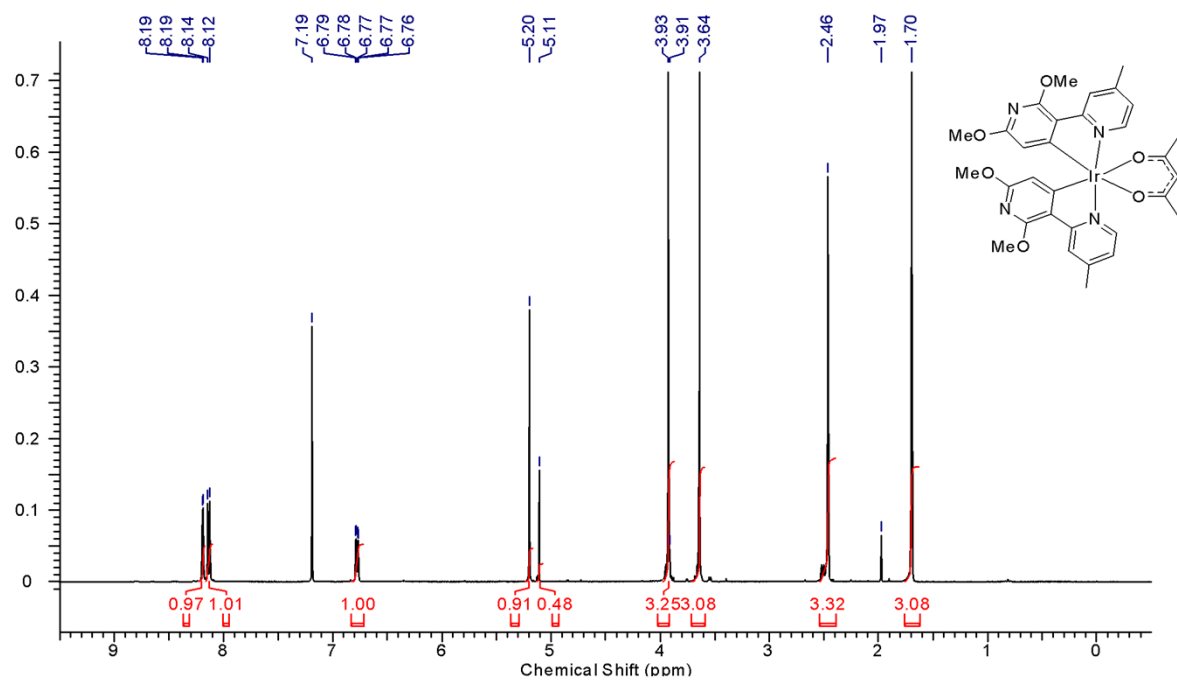

Figure S3.  $^1\text{H}$  NMR of **1** in  $\text{CDCl}_3$ .

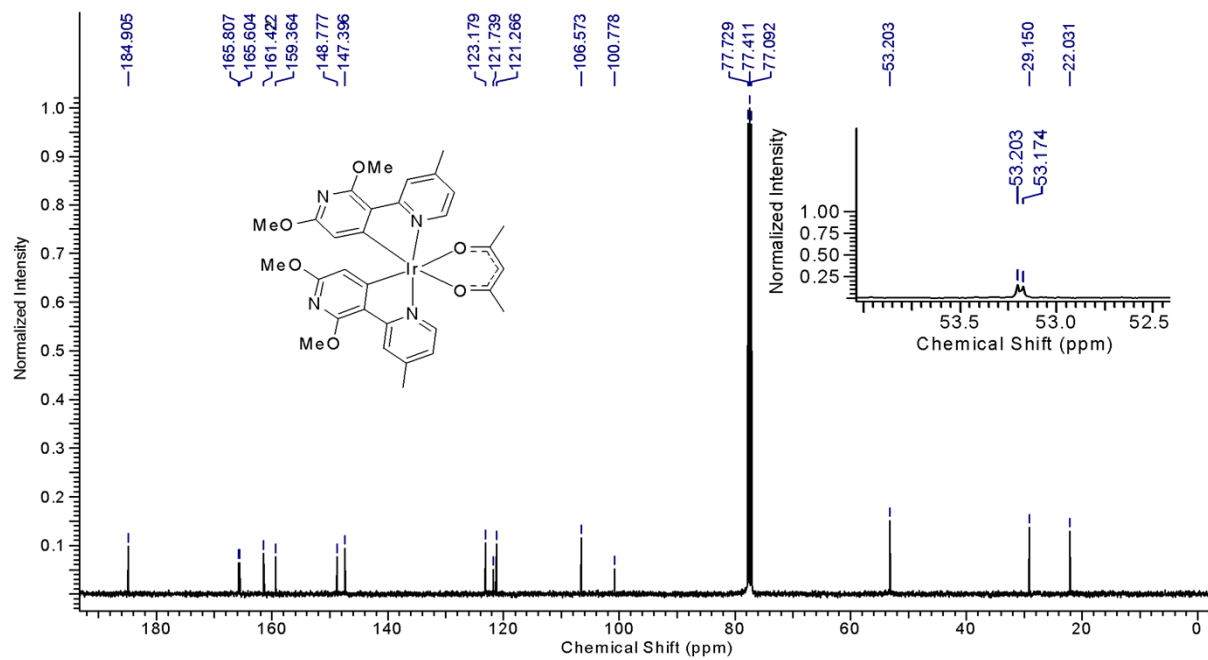

Figure S4.  $^{13}\text{C}$  NMR of **1** in  $\text{CDCl}_3$ .

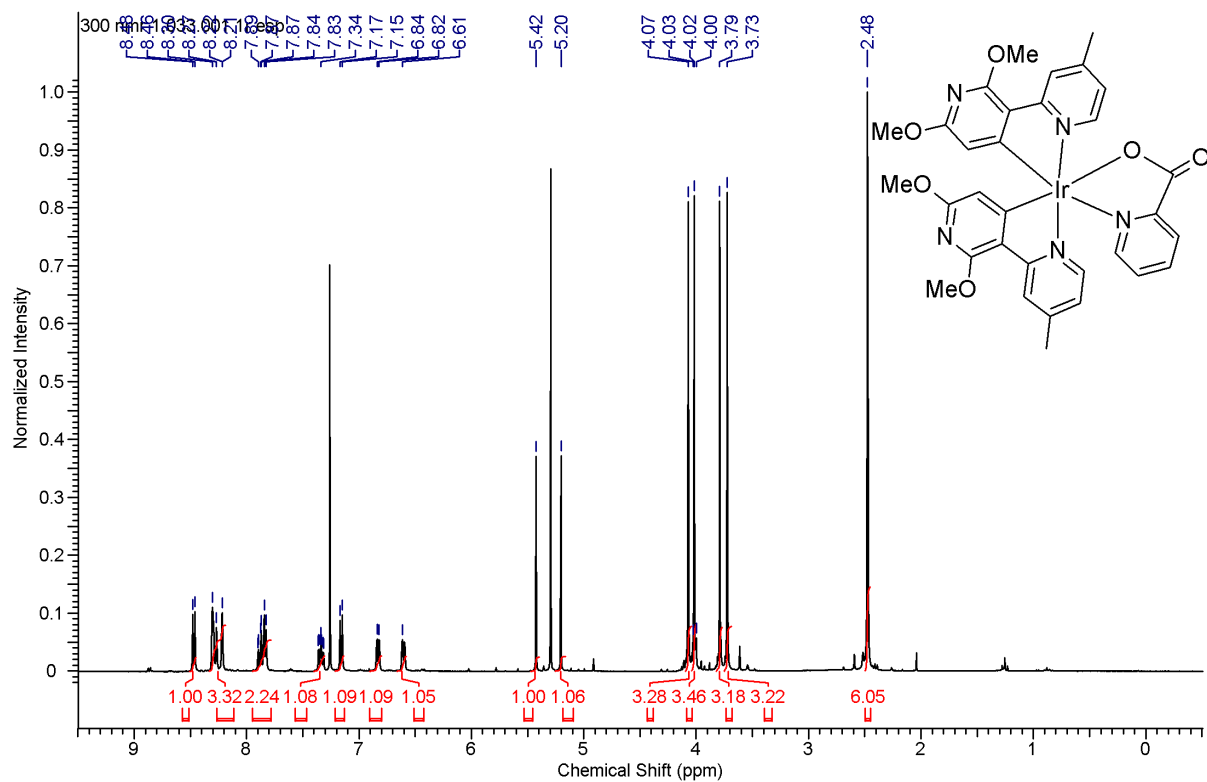

Figure S5.  $^1\text{H}$  NMR of **2** in  $\text{CDCl}_3$ .

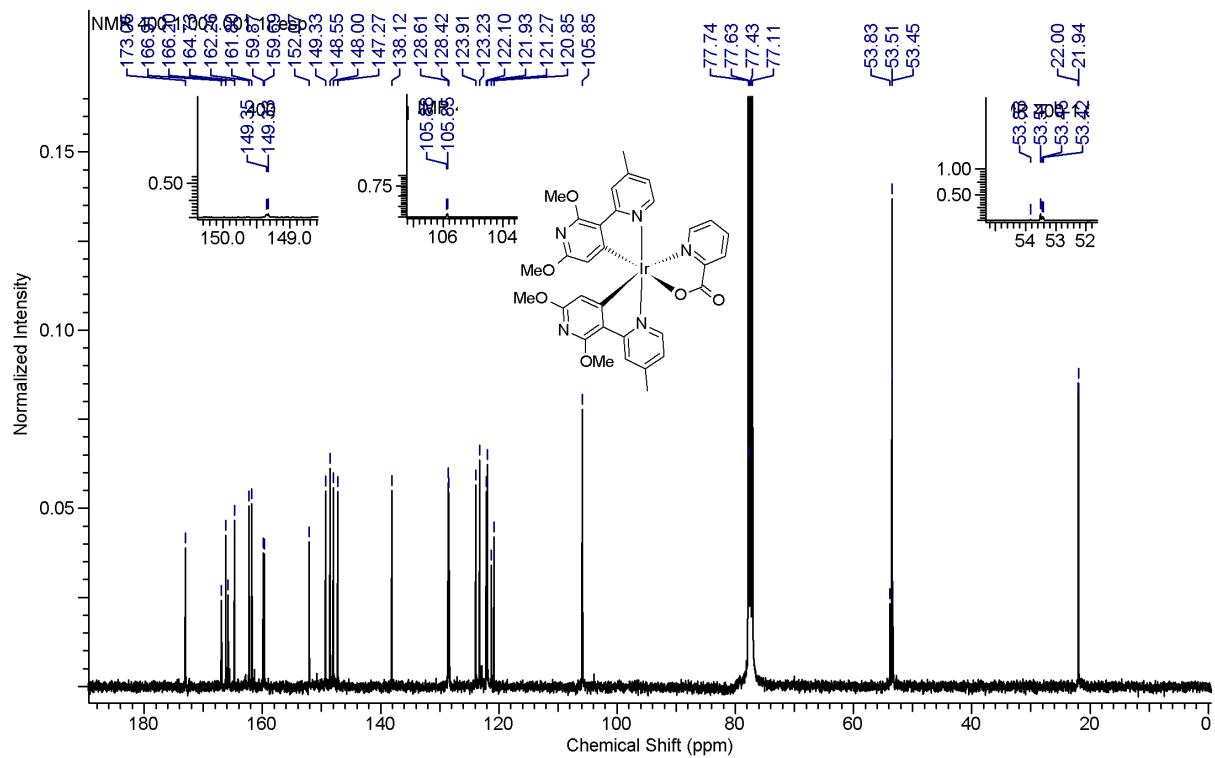

Figure S6.  $^{13}\text{C}$  NMR of **2** in  $\text{CDCl}_3$ .

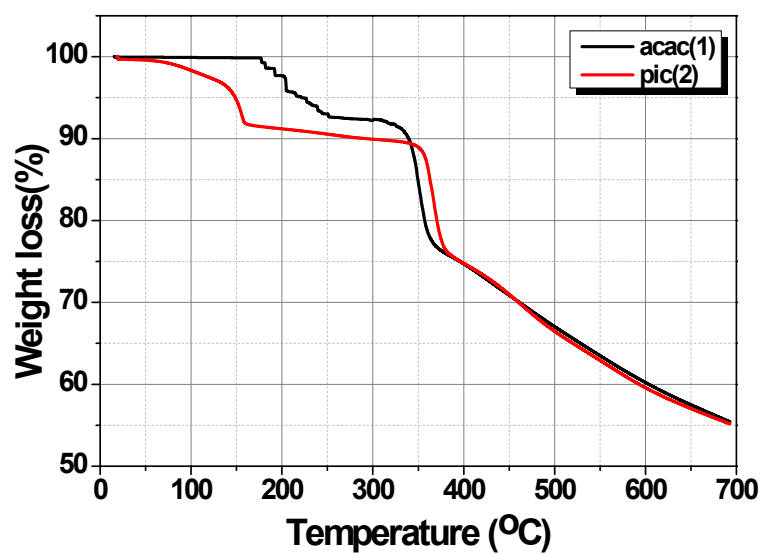

Figure S7. TGA curves of 1 and 2.

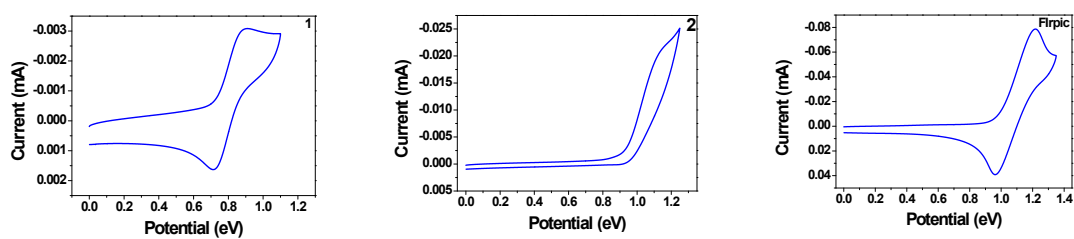

Figure S8. Oxidation potentials of 1, 2 and Firpic.

**Table S1.** Crystal Data and Structure Refinement for **1** and **2**.

| Identification code                        | <b>1</b>                                                          | <b>2</b>                                                          |
|--------------------------------------------|-------------------------------------------------------------------|-------------------------------------------------------------------|
| Empirical formula                          | C <sub>31</sub> H <sub>33</sub> IrN <sub>4</sub> O <sub>6</sub>   | C <sub>36</sub> H <sub>38</sub> IrN <sub>5</sub> O <sub>8</sub>   |
| Formula weight                             | 749.81                                                            | 860.91                                                            |
| Temperature (K)                            | 173(2)                                                            | 173(2)                                                            |
| Wavelength (Å)                             | 0.71073                                                           | 0.71073                                                           |
| Crystal system                             | Orthorhombic                                                      | Triclinic                                                         |
| Space group                                | <i>Aba2</i>                                                       | <i>P</i> -1                                                       |
| <i>a</i> (Å)                               | 15.1324(5)                                                        | 14.8259(15)                                                       |
| <i>b</i> (Å)                               | 19.6891(7)                                                        | 15.4270(15)                                                       |
| <i>c</i> (Å)                               | 9.9117(3)                                                         | 16.4898(16)                                                       |
| $\alpha$ (°)                               | 90                                                                | 87.206(5)                                                         |
| $\beta$ (°)                                | 90                                                                | 77.253(4)                                                         |
| $\gamma$ (°)                               | 90                                                                | 71.403(4)                                                         |
| Volume (Å <sup>3</sup> )                   | 2953.12(17)                                                       | 3485.6(6)                                                         |
| <i>Z</i>                                   | 4                                                                 | 4                                                                 |
| Density (calculated) (Mg/m <sup>3</sup> )  | 1.686                                                             | 1.641                                                             |
| Absorption coefficient (mm <sup>-1</sup> ) | 4.571                                                             | 3.890                                                             |
| F(000)                                     | 1488                                                              | 1720                                                              |
| Crystal size (mm <sup>3</sup> )            | 0.10 × 0.20 × 0.32                                                | 0.06 × 0.10 × 0.15                                                |
| Theta range for data collection            | 2.07 to 28.37°                                                    | 0.86 to 27.00°                                                    |
| Index ranges                               | -19 ≤ <i>h</i> ≤ 20<br>-18 ≤ <i>k</i> ≤ 26<br>-13 ≤ <i>l</i> ≤ 12 | -16 ≤ <i>h</i> ≤ 18<br>-19 ≤ <i>k</i> ≤ 19<br>-21 ≤ <i>l</i> ≤ 21 |

|                                                            |                                    |                                    |
|------------------------------------------------------------|------------------------------------|------------------------------------|
| Reflections collected                                      | 14188                              | 60581                              |
| Independent reflections                                    | 3636 [ $R(\text{int}) = 0.0422$ ]  | 15098 [ $R(\text{int}) = 0.0438$ ] |
| Completeness to $\theta = 26.00^\circ$                     | 99.8 %                             | 99.3 %                             |
| Absorption correction                                      | Semi-empirical from equivalents    |                                    |
| Max. and min. transmission                                 | 0.6578 and 0.3225                  | 0.8001 and 0.5930                  |
| Refinement method                                          | Full-matrix least-squares on $F^2$ |                                    |
| Data / restraints / parameters                             | 3636 / 1 / 191                     | 15098 / 0 / 901                    |
| Goodness-of-fit on $F^2$                                   | 1.055                              | 1.007                              |
| Final R indices [ $I > 2\sigma(I)$ ]                       | $R_1 = 0.0203$ , $wR_2 = 0.0504$   | $R_1 = 0.0327$ , $wR_2 = 0.0651$   |
| R indices (all data)                                       | $R_1 = 0.0278$ , $wR_2 = 0.0547$   | $R_1 = 0.0515$ , $wR_2 = 0.0728$   |
| Largest diff. peak and hole ( $\text{e.}\text{\AA}^{-3}$ ) | 0.940 and -0.359                   | 1.536 and -1.144                   |

**Table S2.** Selected bond lengths ( $\text{\AA}$ ) and bond angles ( $^\circ$ ) for **1**.

|                        |            |                        |            |
|------------------------|------------|------------------------|------------|
| Ir1-C1                 | 1.981(4)   | Ir1-N1                 | 2.035(2)   |
| Ir1-O3                 | 2.125(3)   |                        |            |
| C1-Ir1-C1 <sup>i</sup> | 92.8(2)    | C1-Ir1-N1              | 80.78(13)  |
| C1-Ir1-O3              | 89.27(10)  | C1-Ir1-O3 <sup>i</sup> | 175.90(14) |
| N1-Ir1-C1 <sup>i</sup> | 94.25(13)  | N1-Ir1-O3              | 89.56(10)  |
| N1-Ir1-N1 <sup>i</sup> | 172.84(17) | N1-Ir1-O3 <sup>i</sup> | 95.56(10)  |
| O3-Ir1-O3 <sup>i</sup> | 88.86(14)  |                        |            |

Symmetry transformation used to generate equivalent atoms: i)  $-x, -y, z$ .



**Table S3.** Selected bond lengths (Å) and bond angles (°) for **2**.

|             |            |             |            |
|-------------|------------|-------------|------------|
| Ir1-C10     | 1.978(4)   | Ir1-C23     | 1.989(4)   |
| Ir1-N1      | 2.036(3)   | Ir1-N3      | 2.040(3)   |
| Ir1-N5      | 2.142(3)   | Ir1-O5      | 2.148(3)   |
| Ir2-C42     | 2.001(4)   | Ir2-C55     | 1.995(4)   |
| Ir2-N6      | 2.047(3)   | Ir2-N8      | 2.026(3)   |
| Ir2-N10     | 2.139(3)   | Ir2-O11     | 2.159(3)   |
|             |            |             |            |
| C10-Ir1-C23 | 89.61(15)  | C10-Ir1-N1  | 80.30(14)  |
| C10-Ir1-N3  | 95.85(14)  | C10-Ir1-N5  | 98.22(14)  |
| C10-Ir1-O5  | 173.14(12) | C23-Ir1-N1  | 96.18(14)  |
| C23-Ir1-N3  | 80.50(14)  | C23-Ir1-N5  | 171.59(13) |
| C23-Ir1-O5  | 95.71(13)  | N1-Ir1-N3   | 174.99(12) |
| N1-Ir1-N5   | 88.21(12)  | N1-Ir1-O5   | 94.77(11)  |
| N3-Ir1-N5   | 95.56(12)  | N3-Ir1-O5   | 89.32(11)  |
| N5-Ir1-O5   | 76.74(11)  | C42-Ir2-C55 | 88.41(16)  |
| C42-Ir2-N6  | 80.21(15)  | C42-Ir2-N8  | 94.60(15)  |
| C42-Ir2-N10 | 173.50(14) | C42-Ir2-O11 | 96.73(13)  |
| C55-Ir2-N6  | 100.44(15) | C55-Ir2-N8  | 80.03(16)  |
| C55-Ir2-N10 | 97.95(14)  | C55-Ir2-O11 | 173.10(13) |
| N6-Ir2-N10  | 97.22(12)  | N6-Ir2-O11  | 85.02(12)  |
| N8-Ir2-N6   | 174.75(13) | N8-Ir2-N10  | 87.87(13)  |
| N8-Ir2-O11  | 94.92(12)  | N10-Ir2-O11 | 77.04(11)  |

**Table S4.** Intermolecular C-H $\cdots$ O Hydrogen Bonds for **1** and **2** [ $\text{\AA}$  and  $^\circ$ ]

| D-H $\cdots$ A                                                                                                                                                   | d(D-H) | d(H $\cdots$ A) | d(D $\cdots$ A) | $\angle$ (DHA) |
|------------------------------------------------------------------------------------------------------------------------------------------------------------------|--------|-----------------|-----------------|----------------|
| <b>Complex 1</b>                                                                                                                                                 |        |                 |                 |                |
| C12-H12A $\cdots$ O3 <sup>i</sup>                                                                                                                                | 0.98   | 2.59            | 3.395(5)        | 140.0          |
| [Symmetry transformations used to generate equivalent atoms: i) $-x, -y+1/2, z+1/2$ .]                                                                           |        |                 |                 |                |
| <b>Complex 2</b>                                                                                                                                                 |        |                 |                 |                |
| C2-H2 $\cdots$ O12                                                                                                                                               | 0.95   | 2.41            | 3.266(5)        | 150.6          |
| C46-H46 $\cdots$ O12 <sup>i</sup>                                                                                                                                | 0.95   | 2.56            | 3.133(5)        | 118.7          |
| C61-H61 $\cdots$ O2 <sup>ii</sup>                                                                                                                                | 0.95   | 2.44            | 3.291(5)        | 148.9          |
| C65-H65C $\cdots$ O6 <sup>iii</sup>                                                                                                                              | 0.98   | 2.37            | 3.270(7)        | 151.9          |
| C67-H67B $\cdots$ O10 <sup>iv</sup>                                                                                                                              | 0.99   | 2.43            | 3.253(7)        | 139.6          |
| C69-H69B $\cdots$ O13 <sup>v</sup>                                                                                                                               | 0.98   | 2.45            | 3.329(9)        | 149.2          |
| [Symmetry transformations used to generate equivalent atoms: i) $-x+1, -y, -z+1$ ; ii) $x, y-1, z$ ; iii) $x, y+1, z$ ; iv) $-x+1, -y+1, -z$ ; v) $x-1, y, z$ .] |        |                 |                 |                |

**Table S5.** Intermolecular C-H $\cdots$  $\pi$  for **1** [ $\text{\AA}$  and  $^\circ$ ]. *Cg1*, and *Cg2* are the centroids of the N1/C6-C10, and N2/C1-C5 pyridine rings, respectively.

| D-H $\cdots$ A                             | d(D-H) | d(H $\cdots$ A) | d(D $\cdots$ A) | $\angle$ (DHA) |
|--------------------------------------------|--------|-----------------|-----------------|----------------|
| C11-H11A $\cdots$ <i>Cg2</i> <sup>i</sup>  | 0.98   | 3.23            | 4.07(5)         | 145            |
| C12-H12B $\cdots$ <i>Cg1</i> <sup>ii</sup> | 0.98   | 3.32            | 3.90(4)         | 119            |

Symmetry transformations used to generate equivalent atoms: i)  $-x+1/2, y, z+1/2$ ;ii)  $-x, -y+1/2, z+1/2$ .

**Table S6.** Intermolecular C-H $\cdots\pi$  for **2** [ $\text{\AA}$  and  $^\circ$ ]. Cg1, Cg2, Cg3, Cg4, Cg5, Cg6, and Cg7 are the centroids of the N2/C6-C10, N3/C14-C16, N5/C27-C31, N6/C33-C37, N7/C38-C42, N9/C51-C55, and N10/C59-C63 pyridine rings, respectively.

| D-H $\cdots$ A                       | d(D-H) | d(H $\cdots$ A) | d(D $\cdots$ A) | $\angle$ (DHA) |
|--------------------------------------|--------|-----------------|-----------------|----------------|
| C11-H11A $\cdots$ Cg7 <sup>i</sup>   | 0.98   | 3.13            | 3.66(4)         | 115            |
| C11-H11B $\cdots$ Cg1 <sup>ii</sup>  | 0.98   | 2.99            | 3.82(5)         | 143            |
| C13-H13B $\cdots$ Cg5 <sup>ii</sup>  | 0.98   | 2.96            | 3.64(5)         | 127            |
| C24-H24A $\cdots$ Cg4 <sup>iii</sup> | 0.98   | 3.25            | 3.89(5)         | 124            |
| C25-H25B $\cdots$ Cg6 <sup>iv</sup>  | 0.98   | 3.18            | 4.08(5)         | 153            |
| C28-H28 $\cdots$ Cg5 <sup>v</sup>    | 0.95   | 2.67            | 3.56(5)         | 156            |
| C45-H45B $\cdots$ Cg1 <sup>vi</sup>  | 0.98   | 3.04            | 3.77(5)         | 132            |
| C56-H56A $\cdots$ Cg3 <sup>i</sup>   | 0.98   | 3.13            | 3.77(4)         | 124            |
| C69-H69A $\cdots$ Cg2 <sup>vi</sup>  | 0.98   | 3.26            | 4.11(5)         | 146            |
| C72-H72B $\cdots$ Cg2 <sup>iii</sup> | 0.98   | 3.11            | 3.92(4)         | 141            |

Symmetry transformations used to generate equivalent atoms: i)  $-x+1, -y, -z+1$ ; ii)  $-x+1, -y+1, -z+1$ ; iii)  $-x+1, -y+1, -z$ ; iv)  $x, y+1, z$ ; v)  $x+1, y, z$ ; vi)  $x-1, y, z$ .
